# Supplementary material
Source: publisher figshare collection journal article supplement (https://frontiersin.figshare.com/ndownloader/files/32160146)
Supplement: Supplementary file 1 [file 32160146]

**Supplementary Table 4.** Partial ATPase 8/6 sequences of *P. candidus* and *P. griseus* used for analysis retrieved from GenBank (Corrected nomenclature follows Divya et al. 2019 and present study).

| Corrected  species | Accession Number | Location |
| --- | --- | --- |
| *P. griseus* | *MW447301 | Puducherry, India (type locality) |
| *MW456736 | Visakhapatnam, India |
| *MW447300 | West Bengal, India |
| JX293030 | West Bengal, India |
| JX460975 | West Bengal, India |
| JX460976 | West Bengal, India |
| JX293029 | West Bengal, India |
| KM288588 | Thailand |
| *P. candidus* | *MW447297 | Nagapattinam, India |
|  | JX293025.1 | Chennai, India |
|  | JX293026 | Kerala, India |
|  | JX293027 | Kerala, India |
|  | JX293031 | Veraval, India |
|  | JX293032 | Veraval, India |
|  | JX293033 | Veraval, India |
|  | JX293034 | Veraval, India |
|  | JX460973 | Kerala, India |
|  | JX460974 | Kerala, India |
|  | JX460977 | Veraval, India |
|  | JX460978 | Veraval, India |
|  | JX460979 | Veraval, India |
|  | JX460980 | Veraval, India |
|  | JX460981 | Kerala, India |
|  | JX460982 | Kerala, India |
|  | JX944218 | Veraval, India |
|  | JX944219 | Veraval, India |
|  | JX944220 | Chennai, India |
|  | JX944221 | Kerala, India |
|  | JX944222 | Kerala, India |
|  | JX944223 | Kerala, India |
|  | KJ569773 | Kuwait |
